# Supplementary material for: The Antibacterial and Remineralizing Effects of Biomaterials Combined with DMAHDM Nanocomposite: A Systematic Review
Source: MDPI journal article supplement (doi:10.3390/ma14071688), 2021-03-30
Supplement: s1 [file s1]

Supplementary Materials

# The Antibacterial and Remineralizing Effects of Biomaterials Combined with DMAHDM Nanocomposite: A Systematic Review

Alison Clarin <sup>1</sup>, Daphne Ho <sup>1</sup>, Jana Soong <sup>1</sup>, Cheryl Looi <sup>1</sup>, Deepak Samuel Ipe <sup>1,2</sup> and Santosh Kumar Tadakamadla <sup>1,2,\*</sup>

<sup>1</sup> School of Dentistry and Oral Health, Griffith University, Gold Coast 4217, Australia; alison.clarin@griffithuni.edu.au (A.C.); daphne.ho@griffithuni.edu.au (D.H.); jana.soong@griffithuni.edu.au (J.S.); cheryl.looi@griffithuni.edu.au (C.L.); deepu313@gmail.com (D.S.I.)

<sup>2</sup> Menzies Health Institute Queensland, Gold Coast 4217, Australia

\* Correspondence: santoshkumar.tadakamadla@griffithuni.edu.au; Tel.: +61-756780153

**Table S1.** Background characteristics of the included studies

| Reference             | Sample Size/s                              | Biomaterial Combinations Used and Comparison Group/s                                                                                                                                                                                 | Inoculum Used and Collection Method                                                                                  |
|-----------------------|--------------------------------------------|--------------------------------------------------------------------------------------------------------------------------------------------------------------------------------------------------------------------------------------|----------------------------------------------------------------------------------------------------------------------|
| Wu et al. 2015<br>[1] | Mechanical testing – 36 disks (n = 6)      | (1–5) Five variants with BisGMA-TEGDMA + 10% DMAHDM + 20% NACP + 35% glass + 0%, 2.5%, 5%, 7.5% or 10%, respectively, of microcapsules of formaldehyde and urea<br><br>Comparison group:<br>(6) BisGMA-TEGDMA + 20% NACP + 35% glass | -Saliva collected from 10 adult donors, sterile glycerol used for dilution, placed in the growth medium as inoculum. |
|                       | MTT metabolic assay – 36 disks (n = 6)     |                                                                                                                                                                                                                                      |                                                                                                                      |
|                       | Lactic acid production – 36 disks (n = 6)  |                                                                                                                                                                                                                                      |                                                                                                                      |
|                       | Live/dead assay – 36 images (n = 6)        |                                                                                                                                                                                                                                      |                                                                                                                      |
|                       | CFU counts – 108 disks (n = 6, m = 3)      |                                                                                                                                                                                                                                      |                                                                                                                      |
| Wu et al. 2020<br>[2] | Mechanical testing – 30 disks (n = 6)      | (1–4) Four variants with 20% NACP and DMAHDM mass fraction of 0.75%, 1.5%, 2.25% and 3%, respectively<br><br>Comparison group:<br>(5) BisGMA-TEGDMA resin + 50% glass + 20% NACP                                                     | - Followed same methodology as previous study [3]                                                                    |
|                       | MTT metabolic assay – 30 disks (n = 6)     |                                                                                                                                                                                                                                      |                                                                                                                      |
|                       | Lactic acid production – 30 disks (n = 6)  |                                                                                                                                                                                                                                      |                                                                                                                      |
|                       | Live/dead assay – 90 images (n = 6, m = 3) |                                                                                                                                                                                                                                      |                                                                                                                      |
|                       | CFU counts – 90 disks (n = 6, m = 3)       |                                                                                                                                                                                                                                      |                                                                                                                      |
| Zhang et al. 2015 [4] | Mechanical testing – 54 disks (n = 6)      | (1–3) Three variants with DMAHDM concentrations 1.5%, 2.25% and 3% without MPC, respectively<br><br>(5–7) Three variants with DMAHDM concentrations 0%, 1.5%, 2.25%                                                                  | - Followed same methodology as previous study [3]                                                                    |
|                       | MTT metabolic assay – 30 disks (n = 6)     |                                                                                                                                                                                                                                      |                                                                                                                      |
|                       | Lactic acid production – 30 disks (n = 6)  |                                                                                                                                                                                                                                      |                                                                                                                      |
|                       | Live/dead assay – 90 images (n = 6, m = 3) |                                                                                                                                                                                                                                      |                                                                                                                      |
|                       | CFU counts – 90 disks (n = 6, m = 3)       |                                                                                                                                                                                                                                      |                                                                                                                      |

|                                                  |                                                                                                                                                                                                                                                                                                                                                |                                                                                                                                                                                                                                                                                                              |                                                                                                                                |
|--------------------------------------------------|------------------------------------------------------------------------------------------------------------------------------------------------------------------------------------------------------------------------------------------------------------------------------------------------------------------------------------------------|--------------------------------------------------------------------------------------------------------------------------------------------------------------------------------------------------------------------------------------------------------------------------------------------------------------|--------------------------------------------------------------------------------------------------------------------------------|
| and 3% along with 3% MPC, respectively           |                                                                                                                                                                                                                                                                                                                                                |                                                                                                                                                                                                                                                                                                              |                                                                                                                                |
| Comparison groups: (8) BisGMA-TEGDMA + 70% glass |                                                                                                                                                                                                                                                                                                                                                |                                                                                                                                                                                                                                                                                                              |                                                                                                                                |
| (9) Heliomolar commercial composite              |                                                                                                                                                                                                                                                                                                                                                |                                                                                                                                                                                                                                                                                                              |                                                                                                                                |
| Melo et al.<br>2016 [5]                          | Live/dead assay – 15 disks (n = 15)<br>(total images not specified)                                                                                                                                                                                                                                                                            | (1) BisGMA-TEGDMA + 5% DMAHDM + 0.1% AgNPs + 30% NACP<br><br>Comparison group:<br>(2) BisGMA-TEGDMA                                                                                                                                                                                                          | - Saliva inoculum used, obtained from adult volunteers.<br>- Biofilm grown on sucrose (0.2%) enriched Nutrient medium.         |
| Wang et al.<br>2016 [6]                          | Mechanical testing – 18 disks (n = 6)<br>Live/dead assay – 270 images (5 images per specimen, n = 3, m = 6)<br>CFU counts – 108 disks (n = 6, m = 6)<br>Biofilm biomass – 108 disks (n = 6, m = 6)<br>Polysaccharide production – 108 disks (n = 6, m = 6)                                                                                     | (1) EBPM+3%DMAHDM+20%NACP+50%glass<br><br>Comparison groups:<br>(2) EBPM+20%NACP+50% glass<br>(3) Heliomolar commercial composite                                                                                                                                                                            | - Saliva collected from 15 adult donors.<br>- Composite disks in a 24-well plate immersed in sterile saliva for 2 hrs at 37°C. |
| Wang et al.<br>2016 [7]                          | Mechanical testing – 54 disks (n = 6)<br>Water sorption – 45 disks (n = 5);<br>Protein adsorption – 30 disks (n = 6);<br>Live/dead assay – 300 images (3 images per specimen, n = 5, m = 4)<br>MTT metabolic assay – 120 disks (n = 6, m = 4)<br>CFU counts – 120 disks (n = 6, m = 4)<br>Polysaccharide production – 120 disks (n = 6, m = 4) | (1-4) Four variants with EBPM, 20% NACP and MPC concentrations 0%, 1.5%, 3% and 4.5% without DMAHDM, respectively<br>(5-8) Four variants with EBPM, 20% NACP and MPC concentrations 0%, 1.5%, 3% and 4.5% along with 3% DMAHDM, respectively<br><br>Comparison group:<br>(9) Heliomolar commercial composite | - Followed same methodology as previous study [8]                                                                              |
| Xie et al. 2016<br>[9]                           | Mechanical testing – 60 disks (n = 6)<br>Protein absorption – 30 disks (n = 6)<br>MTT assay – 90 disks (n = 6, m = 3)<br>Live/dead assay – 90 images (3 images per specimen, n = 6)<br>CFU counts – 90 disks (n = 6, m = 3)                                                                                                                    | (1) EBPM + 35% glass + 30% NACP + 3% MPC<br>(2) EBPM + 35% glass + 30% NACP + 3% MPC + 1.5% DMAHDM<br>(3) EBPM + 35% glass + 30% NACP + 3% MPC + 3% DMAHDM<br><br>Comparison groups:<br>(4) EBPM + 35% glass + 30% NACP                                                                                      | - Followed same methodology as previous study [3]                                                                              |

|                              | pH of biofilm – 30 culture mediums (n = 6)                                                                                                                                                                                                                                                                                       | (5) Heliomolar commercial composite                                                                                                                                                                                                                                                                                                                                                                                                                                         |                                                                                                                                                                                                                                                                                                                                                                                                                   |
|------------------------------|----------------------------------------------------------------------------------------------------------------------------------------------------------------------------------------------------------------------------------------------------------------------------------------------------------------------------------|-----------------------------------------------------------------------------------------------------------------------------------------------------------------------------------------------------------------------------------------------------------------------------------------------------------------------------------------------------------------------------------------------------------------------------------------------------------------------------|-------------------------------------------------------------------------------------------------------------------------------------------------------------------------------------------------------------------------------------------------------------------------------------------------------------------------------------------------------------------------------------------------------------------|
| Zhang et al. 2016 [10]       | <p>Mechanical testing – 21 disks (n = 6)</p> <p>Live/dead assay – 84 images (4 images per specimen, n = 3)</p> <p>MTT metabolic assay – 42 disks (n = 6)</p> <p>Lactic acid production – 42 disks (n = 6)</p> <p>CFU counts – 147 disks (n = 7, m = 3)</p> <p>Ca and P ion release – 24 disks (3 pH levels per group, n = 4)</p> | <p>(1-5) Five variants with BisGMA-TEGDMA + 20% NACP + 50% glass with QAM CL of 3, 6, 12, 16 and 18, respectively</p> <p>Comparison groups:</p> <p>(6) BisGMA-TEGDMA + 20% NACP + 50% glass</p> <p>(7) Renamel Microfill commercial composite</p>                                                                                                                                                                                                                           | <p>- Followed same methodology as previous study [3]</p>                                                                                                                                                                                                                                                                                                                                                          |
| Xiao et al. 2017 [11]        | <p>Mechanical testing – 24 disks (n = 6)</p> <p>Ca and P ion release – 48 specimens (2 pH levels per group, n = 6)</p> <p>Acid neutralisation – 48 specimens (2 pH levels per group, n = 6)</p> <p>Dentine hardness – 36 specimens (n = 6)</p> <p>SEM examination – 24 specimens (n = 6)</p>                                     | <p>(1) EBPM-AgNPs+3%MPC+3% DMAHDM+30% NACP+35% glass</p> <p>(2) EBPM-AgNPs+3% MPC+3% DMAHDM+30% NACP+35%glass+PAMAM</p> <p>Comparison groups:</p> <p>(3) Demineralised root dentine specimen</p> <p>(4) Demineralised root dentine specimen + PAMAMa</p> <p>(5) EBPM + 30% NACP + 35% glassb</p> <p>(6) Heliomolar commercial compositeb</p> <p>(7) Renamel Microfill commercial compositeb</p> <p>(8) Sound dentine specimenc</p> <p>(9) Acid-etched dentine specimenc</p> | <p>- Permanent premolars of humans that were single rooted and caries-free were disinfected and stored in distilled water.</p> <p>- Root dentine specimens were acid-etched to create demineralization and divided into 4 groups.</p> <p>- All specimens were immersed in artificial saliva at neutral pH for 23 hours, followed by one hour immersion in lactic acid solution (pH 4.0) each day for 21 days.</p> |
| Zhang et al. 2017 [12]       | <p>Mechanical testing – 24 disks (n = 6)</p> <p>Protein adsorption – 24 disks (n = 6)</p> <p>Live/dead assay – 24 images (2 images per specimen, n = 6)</p> <p>Metabolic activity – 30 disks (n = 6)</p> <p>Lactic acid production - 30 disks (n = 6)</p> <p>CFU counts – 48 disks (n = 4, m = 3)</p>                            | <p>(1) BisGMA-TEGDMA + 70% glass + 3% MPC</p> <p>(2) BisGMA-TEGDMA + 70% glass + 1.5% DMAHDM</p> <p>(3) BisGMA-TEGDMA + 70% glass + 3% MPC + 1.5% DMAHDM</p> <p>Comparison group:</p> <p>(4) Heliomolar commercial composite</p>                                                                                                                                                                                                                                            | <p>- Saliva collected from 10 adult donors and an oral plaque microcosm model used to incubate biofilms on the polymeric composite.</p>                                                                                                                                                                                                                                                                           |
| Al-Dulaijan et al. 2018 [13] | <p>Mechanical testing – 18 disks (n = 6)</p> <p>Live/dead assay – 54 images (18 images per specimen, n = 6)</p> <p>MTT metabolic activity – 18 disks (n = 6)</p> <p>Lactic acid production – 18 disks (n = 6)</p> <p>CFU counts – 54 disks (n = 6, m = 3)</p> <p>Ca &amp; P ions:</p>                                            | <p>(1) EBPM+20%NACP+50%glass+3%DMAHDM</p> <p>(2) EBPM+20%NACP+50%glass</p> <p>Comparison group:</p> <p>(3) Heliomolar commercial composite</p>                                                                                                                                                                                                                                                                                                                              | <p>- Saliva collected from 10 adult donors.</p> <p>- Composite disks in a 24-well plate incubated in 5% CO<sub>2</sub> for 8hrs at 37°C.</p>                                                                                                                                                                                                                                                                      |

|                             |                                                                                                                                                                                                                                                                                                                                                    |                                                                                                                                                                                                                                                                               |                                                                                                                                                                                                                                                                                        |
|-----------------------------|----------------------------------------------------------------------------------------------------------------------------------------------------------------------------------------------------------------------------------------------------------------------------------------------------------------------------------------------------|-------------------------------------------------------------------------------------------------------------------------------------------------------------------------------------------------------------------------------------------------------------------------------|----------------------------------------------------------------------------------------------------------------------------------------------------------------------------------------------------------------------------------------------------------------------------------------|
| Wang et al.<br>2019 [14]    | Initial release – 12 disks (n = 6); Recharge & re-release – 6 disks (n = 3).                                                                                                                                                                                                                                                                       |                                                                                                                                                                                                                                                                               |                                                                                                                                                                                                                                                                                        |
|                             | Surface roughness – 30 disks (n = 6)<br>Composite surface charge density – 30 disks (n = 6)<br>Protein adsorption – 30 disks (n = 6)<br>Live/dead assay – 90 images (18 images per specimen, n = 6)<br>CFU counts – 120 disks (n = 6, m = 4)<br>Metabolic assay – 120 disks (n = 6, m = 4)<br>Polysaccharide production – 120 disks (n = 6, m = 4) | (1) EBPM+3%MPC+20%NACP+50% glass<br>(2) EBPM+3%DMAHDM+20%NACP+50% glass<br>(3) EBPM+3%DMAHDM+3%MPC+20%NACP+50% glass<br><br>Comparison groups:<br>(4) EBPM+20%NACP+50%glass<br>(5) Heliomolar commercial composite                                                            | - Saliva collected from 15 adult donors was centrifuged and sterilized.<br>- Composite disks in a 24-well plate immersed in sterile saliva for 2 hrs at 37°C.                                                                                                                          |
| Xiao et al.<br>2019 [15]    | Mechanical testing – 42 disks (n = 6)<br>Protein adsorption – 24 disks (n = 6)<br>Live/dead assay – 180 images (15 images per specimen, n = 3, m = 3)<br>MTT metabolic activity – 72 disks (n = 6, m = 3)<br>Polysaccharide production – 72 disks (n = 6, m = 3)<br>CFU counts – 72 disks (n = 6, m = 3)                                           | (1-4) Four variants with EBPM+30%NACP+3%MPC+3%DMAHDM +35%glass and AgNPs concentrations 0%, 0.08%, 0.12% and 0.16%, respectively<br><br>Comparison groups:<br>(5) EBPM+30%NACP+35% glass<br>(6) Renamel Microfill commercial composite<br>(7) Heliomolar commercial composite | - Saliva collected from 12 adult donors.<br>- Composite disks in a 24-well plate immersed in sterile saliva for 2 hrs at 37°C.                                                                                                                                                         |
| Bhadila et al.<br>2020 [16] | CFU counts – 15 disks (n = 5)<br>Lactic acid production – 15 disks (n = 5)<br>Ca & P ions:<br>Initial release – 24 disks(n = 8); Recharge & re-release – 12 disks (n = 4)                                                                                                                                                                          | (1) EBPM+20%NACP+50% glass<br>(2) EBPM+3%DMAHDM+20%NACP+50% glass<br><br>Comparison group:<br>(3) Heliomolar commercial composite                                                                                                                                             | - Composite disks in a 24-well plate immersed in sterile saliva for 16 hrs at 37°C.                                                                                                                                                                                                    |
| Zhou et al.<br>2020 [17]    | Mechanical testing - 30 disks (n = 6)<br>Live/dead staining - 180 images (3 images per specimen, n = 3, m = 4)<br>MTT metabolic assay – 120 disks (n = 6, m = 4)<br>Lactic acid production – 120 disks (n = 6, m = 4)                                                                                                                              | (1) BisGMA-TEGDMA+30%NACP+35% glass<br>(2) BisGMA-TEGDMA+3%DMAHDM+65% glass<br>(3) BisGMA-TEGDMA+30%NACP+3%DMAHDM+35% glass<br><br>Comparison groups:<br>(4) BisGMA-TEGDMA + 65% glass<br>(5) Heliomolar commercial composite<br>(6) Sound dentine specimen                   | - 200 mL of water (deionized) was used to submerge composite disks and were then centrifuged.<br>- Disks sterilized in ethylene oxide and degassed for 1 week.<br>- 30 bovine teeth were used to make root dentine disks that were etched and randomly bonded to a composite specimen. |

---

Polysaccharide production – 120 disks (n =  
6, m = 4)  
Dentine hardness – 30 root dentine disks  
(n = 6, m = 1)

---

Number of specimens per composite group CFU (colony-forming units)

m (number of microorganism groups tested)

BisGMA-TEGDMA - Bisphenol A-Glycidyl MethAcrylate and TriEthylene Glycol DiMethAcrylate mixed at 1:1(mass) ratio and rendered light-curable with addition of 0.2% camphorquinone and 0.8% ethyl 4-N,Ndimethylaminobenzoate

DMAHDM - DiMethylAminoHexaDecyl Methacrylate

NACP - Nanoparticles of Amorphous Calcium Phosphate

MPC - 2-Methacryloyloxyethyl PhosphorylCholine

AgNPs- Silver nanoparticles

EBPM- Ethoxylated BisPhenol A DiMethAcrylate (EBPADMA) and PyroMellitic GlycerolDiMethacrylate (PMGDM) mixed at a 1:1(mass) ratio and rendered light-curable with addition of 0.2% camphorquinone and 0.8% ethyl 4-N,N-diethylaminobenzoateCa (calcium)

P (phosphate)

QAM - Quaternary Ammonium Methacrylate

CL - Chain Length

SEM - Scanning Electron Microscopy

PAMAM – PolyAMidoAMine dendrimer

a Comparison group/s for all remineralizing tests

b Comparison group/s for mechanical tests only

c Comparison group/s only included for root dentine hardness test

## References

1. Wu, J.; Weir, M.D.; Melo, M.A.; Xu, H.H. Development of novel self-healing and antibacterial dental composite containing calcium phosphate nanoparticles. *Journal of dentistry* **2015**, *43*, 317–326, doi:10.1016/j.jdent.2015.01.009.
2. Wu, J.; Zhou, H.; Weir, M.D.; Melo, M.A.; Levine, E.D.; Xu, H.H. Effect of dimethylaminohexadecyl methacrylate mass fraction on fracture toughness and antibacterial properties of CaP nanocomposite. *Journal of dentistry* **2015**, *43*, 1539–1546, doi:10.1016/j.jdent.2015.09.004.
3. Zhou, H.; Weir, M.D.; Antonucci, J.M.; Schumacher, G.E.; Zhou, X.D.; Xu, H.H.K. Evaluation of three-dimensional biofilms on antibacterial bonding agents containing novel quaternary ammonium methacrylates. *International Journal of Oral Science* **2014**, *6*, 77–86, doi:10.1038/ijos.2014.18.
4. Zhang, N.; Ma, J.; Melo, M.A.; Weir, M.D.; Bai, Y.; Xu, H.H. Protein-repellent and antibacterial dental composite to inhibit biofilms and caries. *Journal of dentistry* **2015**, *43*, 225–234, doi:10.1016/j.jdent.2014.11.008.
5. Melo, M.A.; Orrego, S.; Weir, M.D.; Xu, H.H.; Arola, D.D. Designing Multiagent Dental Materials for Enhanced Resistance to Biofilm Damage at the Bonded Interface. *ACS applied materials & interfaces* **2016**, *8*, 11779–11787, doi:10.1021/acsami.6b01923.

6. Wang, L.; Melo, M.A.; Weir, M.D.; Xie, X.; Reynolds, M.A.; Xu, H.H. Novel bioactive nanocomposite for Class-V restorations to inhibit periodontitis-related pathogens. *Dental materials : official publication of the Academy of Dental Materials* **2016**, *32*, e351–e361, doi:10.1016/j.dental.2016.09.023.
7. Wang, L.; Xie, X.; Imazato, S.; Weir, M.D.; Reynolds, M.A.; Xu, H.H. A protein-repellent and antibacterial nanocomposite for Class-V restorations to inhibit periodontitis-related pathogens. *Materials science & engineering. C, Materials for biological applications* **2016**, *67*, 702–710, doi:10.1016/j.msec.2016.05.080.
8. Li, F.; Weir, M.D.; Chen, J.; Xu, H.H. Effect of charge density of bonding agent containing a new quaternary ammonium methacrylate on antibacterial and bonding properties. *Dental materials : official publication of the Academy of Dental Materials* **2014**, *30*, 433–441, doi:10.1016/j.dental.2014.01.002.
9. Xie, X.; Wang, L.; Xing, D.; Arola, D.D.; Weir, M.D.; Bai, Y.; Xu, H.H. Protein-repellent and antibacterial functions of a calcium phosphate rechargeable nanocomposite. *Journal of dentistry* **2016**, *52*, 15–22, doi:10.1016/j.jdent.2016.06.003.
10. Zhang, K.; Cheng, L.; Weir, M.D.; Bai, Y.X.; Xu, H.H. Effects of quaternary ammonium chain length on the antibacterial and remineralizing effects of a calcium phosphate nanocomposite. *International journal of oral science* **2016**, *8*, 45–53, doi:10.1038/ijos.2015.33.
11. Xiao, S.; Liang, K.; Weir, M.D.; Cheng, L.; Liu, H.; Zhou, X.; Ding, Y.; Xu, H.H.K. Combining Bioactive Multifunctional Dental Composite with PAMAM for Root Dentin Remineralization. *Materials (Basel, Switzerland)* **2017**, *10*, doi:10.3390/ma10010089.
12. Zhang, N.; Zhang, K.; Melo, M.A.; Weir, M.D.; Xu, D.J.; Bai, Y.; Xu, H.H. Effects of Long-Term Water-Aging on Novel Anti-Biofilm and Protein-Repellent Dental Composite. *Int J Mol Sci* **2017**, *18*, doi:10.3390/ijms18010186.
13. Al-Dulaijan, Y.A.; Cheng, L.; Weir, M.D.; Melo, M.A.S.; Liu, H.; Oates, T.W.; Wang, L.; Xu, H.H.K. Novel rechargeable calcium phosphate nanocomposite with antibacterial activity to suppress biofilm acids and dental caries. *Journal of dentistry* **2018**, *72*, 44–52, doi:10.1016/j.jdent.2018.03.003.
14. Wang, L.; Xie, X.; Qi, M.; Weir, M.D.; Reynolds, M.A.; Li, C.; Zhou, C.; Xu, H.H.K. Effects of single species versus multispecies periodontal biofilms on the antibacterial efficacy of a novel bioactive Class-V nanocomposite. *Dental materials : official publication of the Academy of Dental Materials* **2019**, *35*, 847–861, doi:10.1016/j.dental.2019.02.030.
15. Xiao, S.; Wang, H.; Liang, K.; Tay, F.; Weir, M.D.; Melo, M.A.S.; Wang, L.; Wu, Y.; Oates, T.W.; Ding, Y., et al. Novel multifunctional nanocomposite for root caries restorations to inhibit periodontitis-related pathogens. *Journal of dentistry* **2019**, *81*, 17–26, doi:10.1016/j.jdent.2018.12.001.
16. Bhadila, G.; Baras, B.H.; Weir, M.D.; Wang, H.; Melo, M.A.S.; Hack, G.D.; Bai, Y.; Xu, H.H.K. Novel antibacterial calcium phosphate nanocomposite with long-term ion recharge and re-release to inhibit caries. *Dent Mater J* **2020**, *4*, 678–689, doi:10.4012/dmj.2019-203.
17. Zhou, W.; Zhou, X.; Huang, X.; Zhu, C.; Weir, M.D.; Melo, M.A.S.; Bonavente, A.; Lynch, C.D.; Imazato, S.; Oates, T.W., et al. Antibacterial and remineralizing nanocomposite inhibit root caries biofilms and protect root dentin hardness at the margins. *Journal of dentistry* **2020**, 10.1016/j.jdent.2020.103344, 103344, doi:10.1016/j.jdent.2020.103344.
